# Supplementary material for: Sex Differences in CKD-Associated Mortality From 1990 to 2019: Data From the Global Burden of Disease Study
Source: PubMed Central journal article supplement — Kidney Med. 2022 Aug 19;4(10):100535. doi: 10.1016/j.xkme.2022.100535 (PMC9490202; doi:10.1016/j.xkme.2022.100535), 2022-08-19
Supplement: mmc1.pdf [file mmc1.pdf]

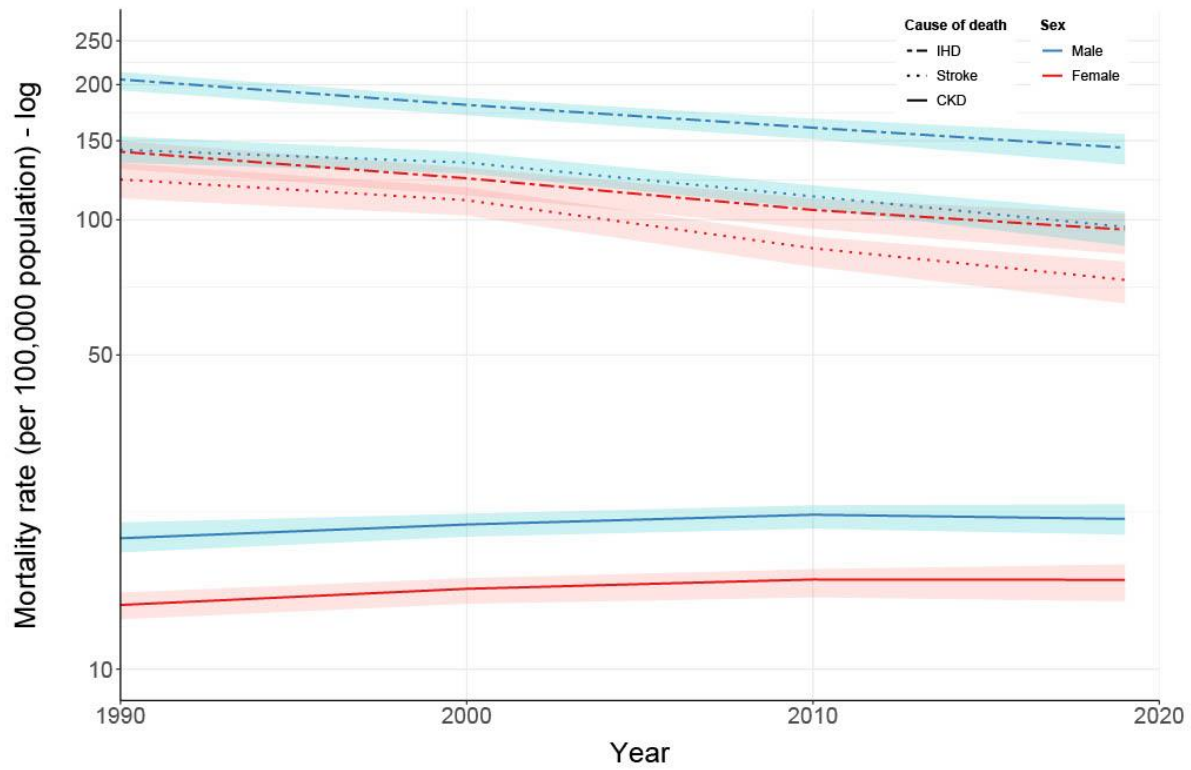

**Figure S2** Global sex-specific age-standardized mortality rates (per 100,000 population) for chronic kidney disease (CKD), ischemic heart disease (IHD) and stroke in 1990, 2000, 2010 and 2019.

**Figure S3** Sex-specific chronic kidney disease (CKD) mortality rates (per 100,000 population) in 2019, plotted by age group, for each of the 50 selected countries.

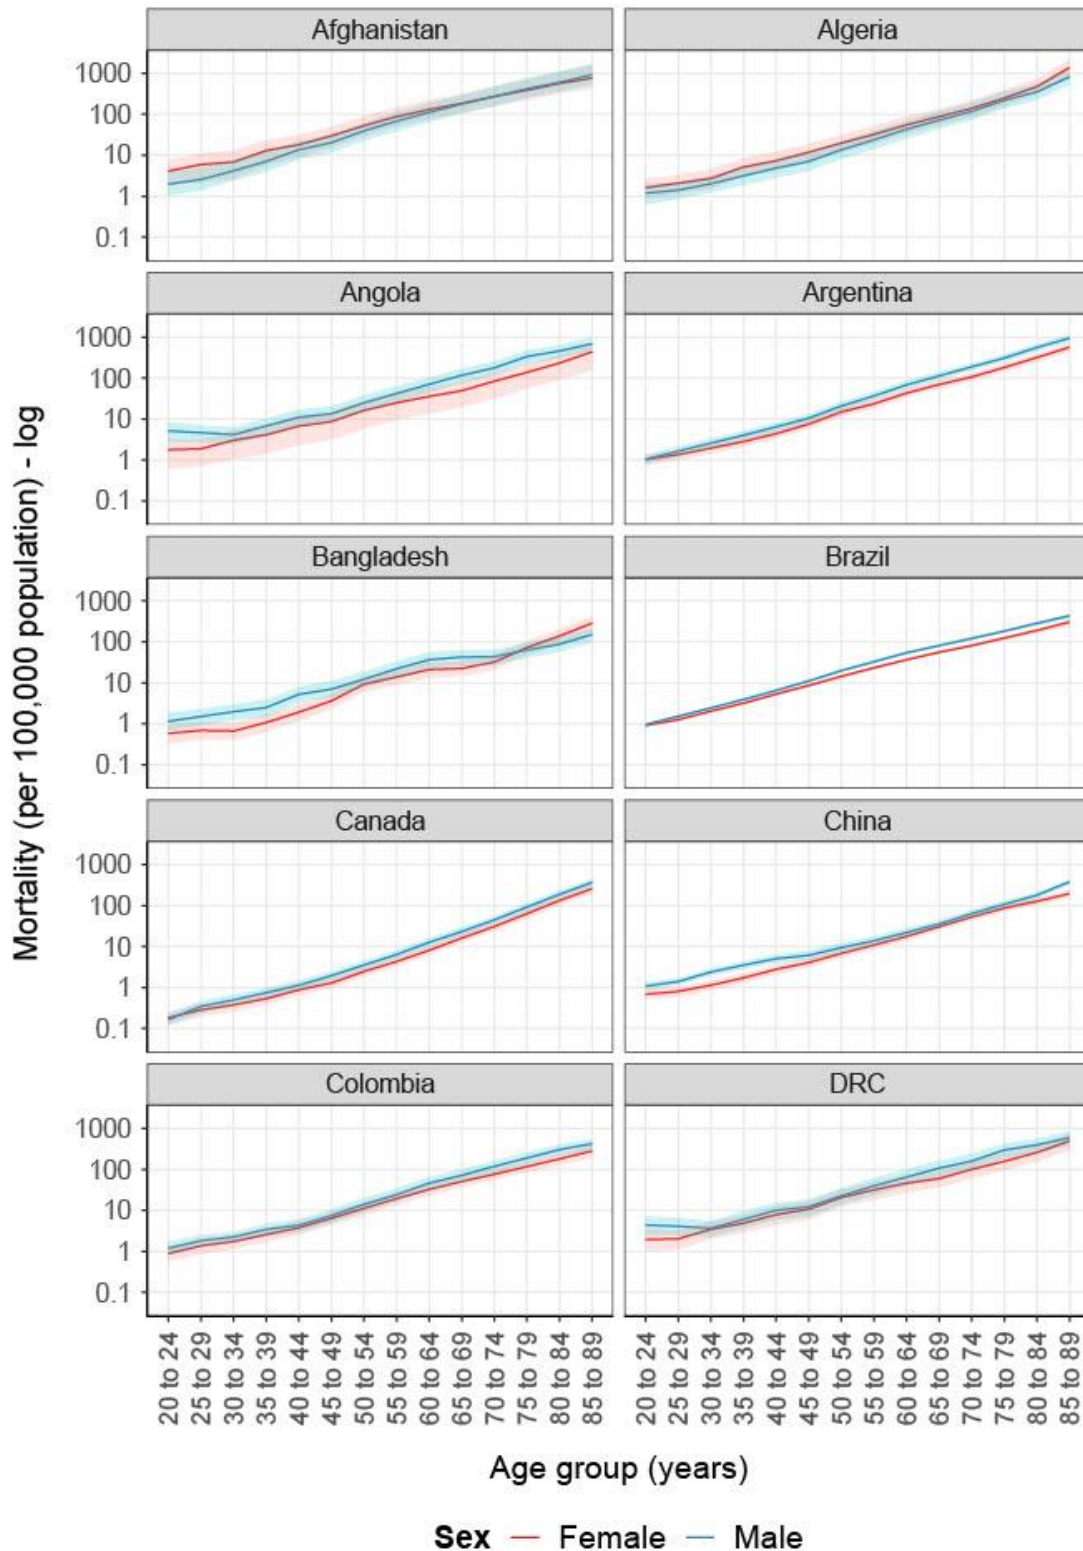

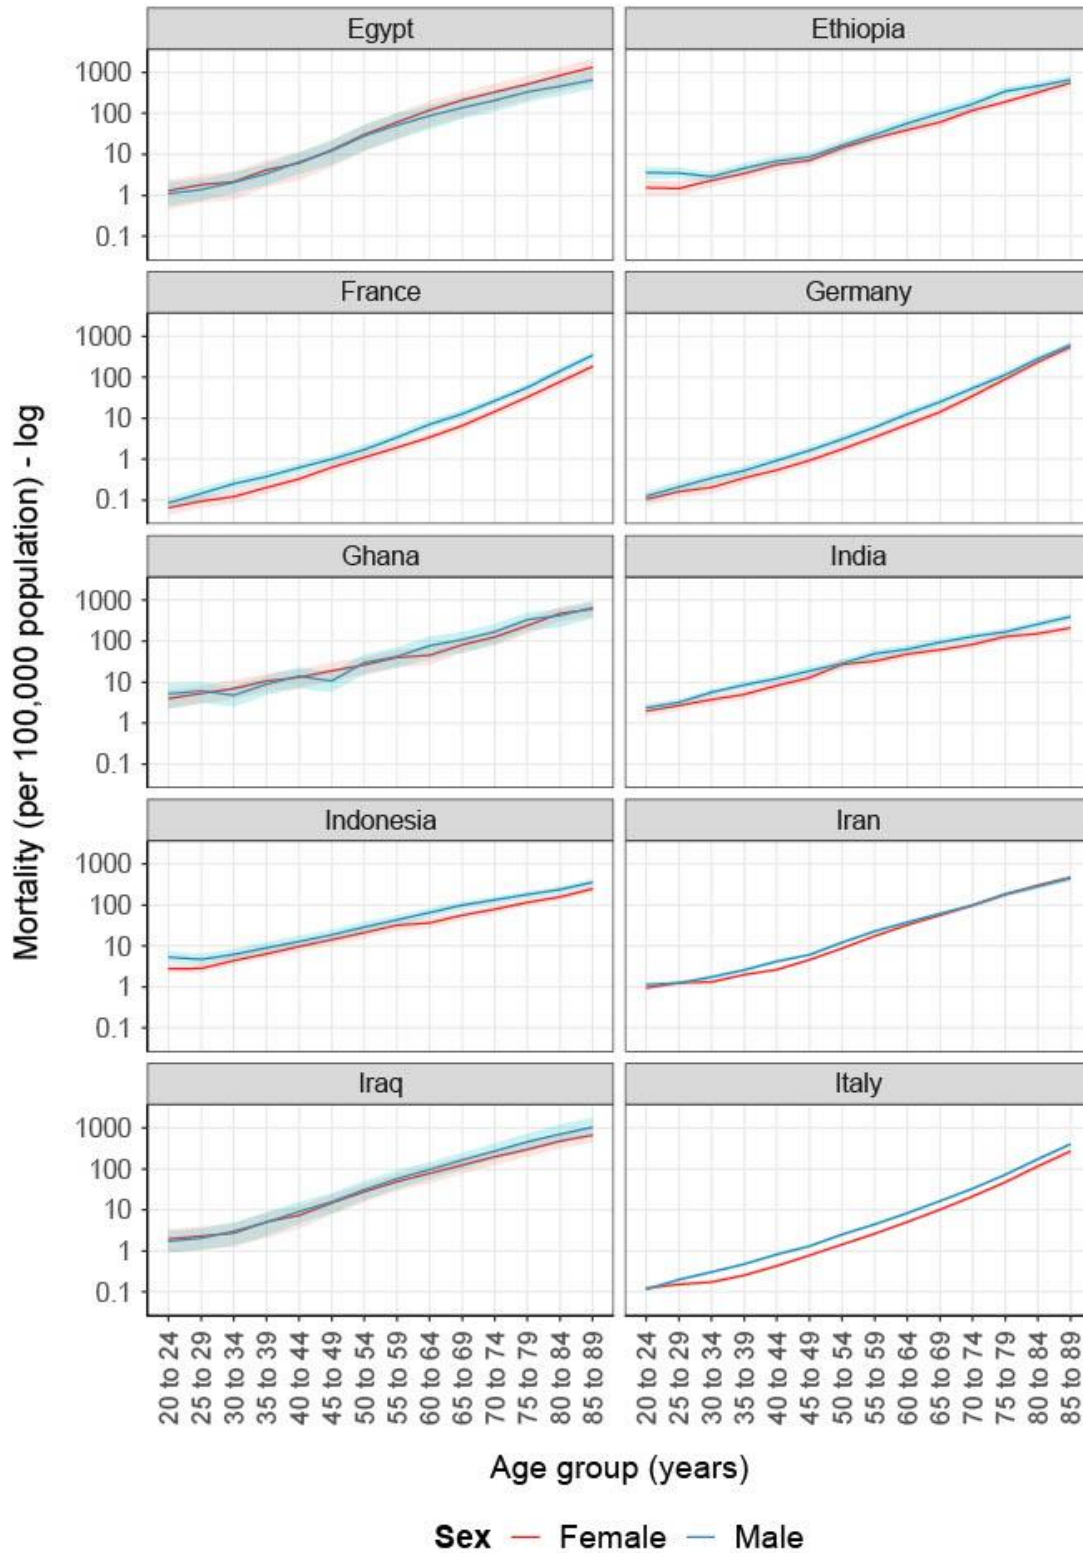

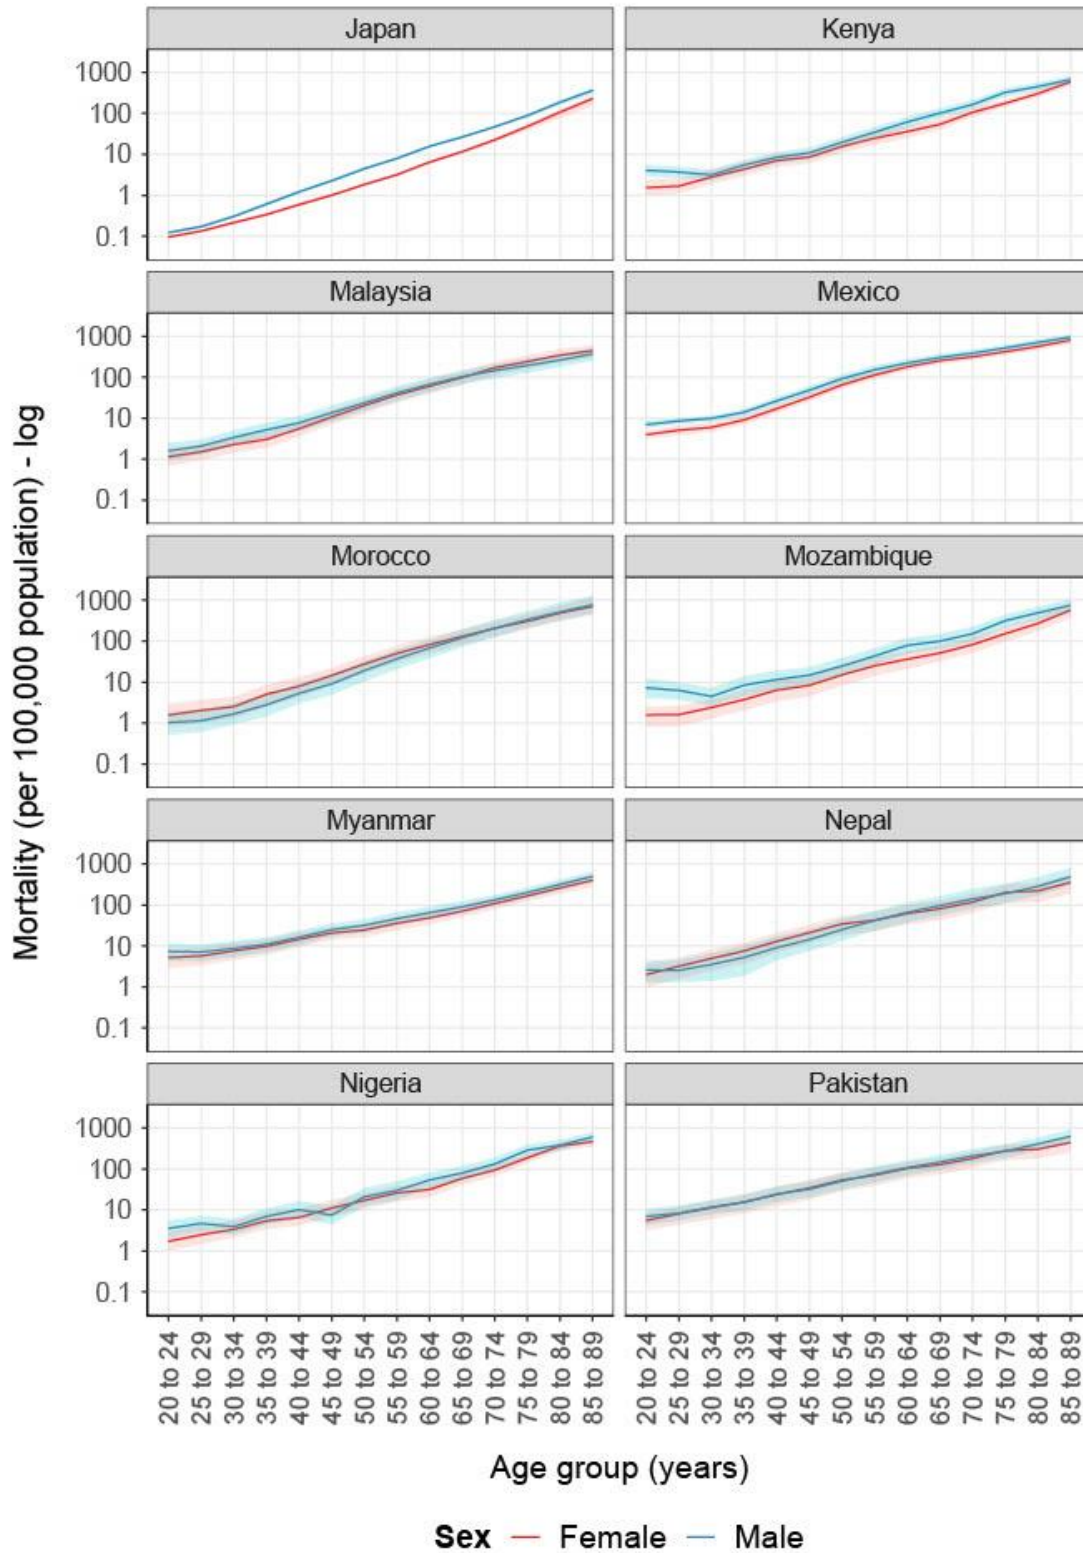

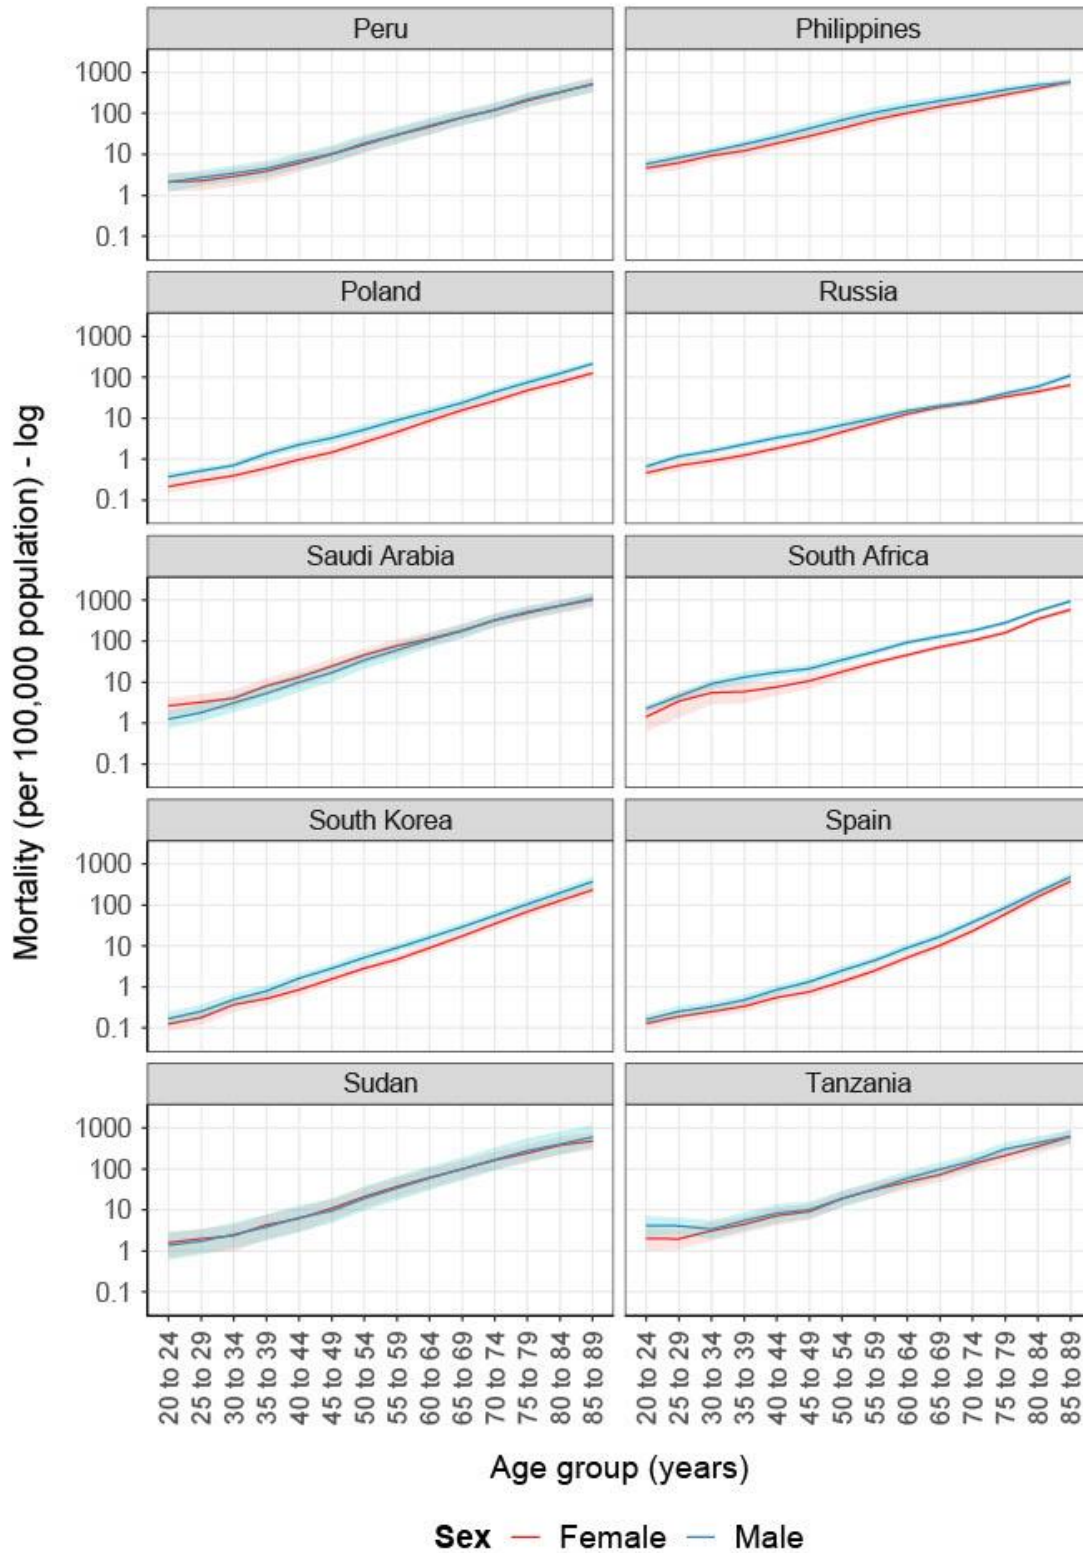

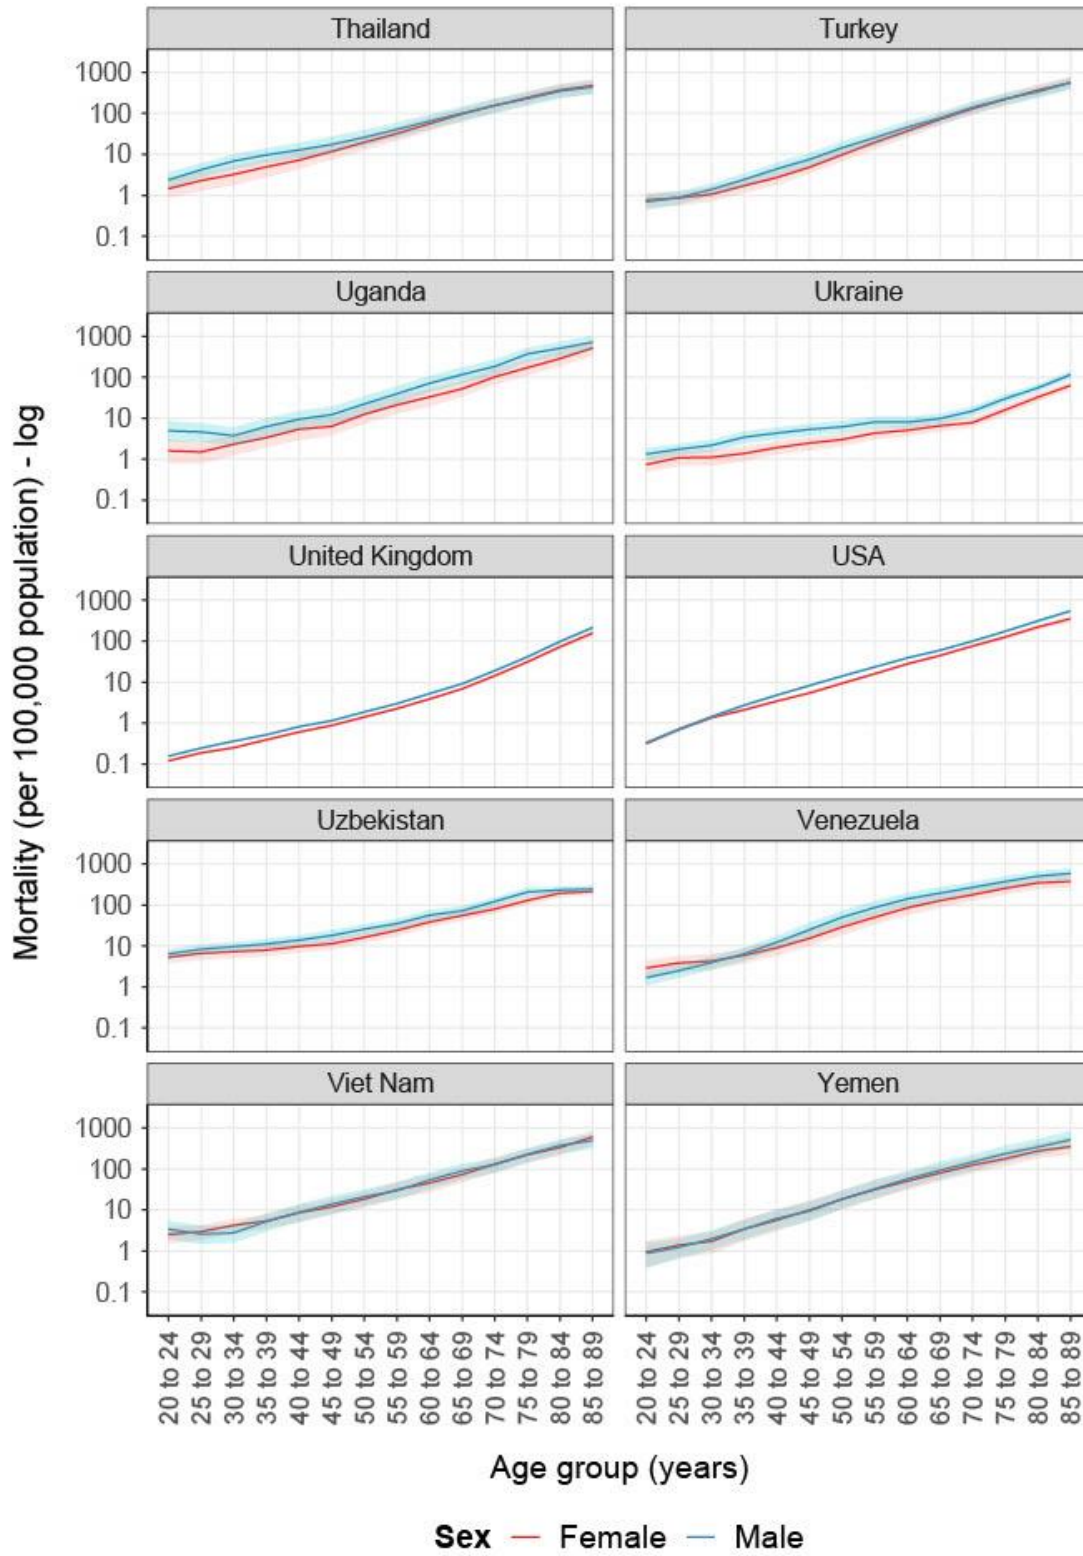

**Table S1** The International Classification of Diseases and Injuries (ICD)-9 and ICD-10 codes used in the Global Burden of Disease (GBD) Study to ascertain different categories of chronic kidney disease (CKD) aetiology, ischemic heart disease (IHD) and stroke.<sup>1</sup>

| Cause & aetiology        | ICD 9 Codes                                                                                                                                                                   | ICD 10 Codes                                                                                                                                                                     |
|--------------------------|-------------------------------------------------------------------------------------------------------------------------------------------------------------------------------|----------------------------------------------------------------------------------------------------------------------------------------------------------------------------------|
| <b>CKD</b>               | 249.4-249.41, 250.4-250.49, 285.21, 403-404.93, 581-587.9, 753.0-753.4, 753.6-753.9, V13.03-V13.09, V18.6, V18.69, V42.0, V45.1-V45.12, V45.73, V56-V56.8, V59.4, V81.5-V81.6 | D63.1, E08.2-E08.29, E10.2-E10.29, E11.2-E11.29, E12.2, E13.2-E13.29, E14.2, I12-I13.9, N02-N08.8, N15.0, N17-N19, Q60-Q63.2, Q63.8-Q63.9, Q64.2-Q64.9, Z49-Z49.32, Z52.4, Z99.2 |
| Type 1 diabetes mellitus | 250.4, 250.41, 250.43-250.49                                                                                                                                                  | E10.2-E10.29                                                                                                                                                                     |
| Type 2 diabetes mellitus | 250.40, 250.42                                                                                                                                                                | E11.2-E11.29                                                                                                                                                                     |
| Hypertension             | 403-404.93                                                                                                                                                                    | I12-I13.9                                                                                                                                                                        |
| Glomerulonephritis       | 581-583.9                                                                                                                                                                     | N03-N06.9, N08-N08.8                                                                                                                                                             |
| Other                    | 753.0-753.4, 753.6-753.9                                                                                                                                                      | N02-N02.9, N07-N07.9, Q60-Q63.2, Q63.8-Q63.9, Q64.2-Q64.9                                                                                                                        |
| <b>IHD</b>               | 410-414.9, V17.3                                                                                                                                                              | I20-I21.6, I21.9-I25.9, Z82.4-Z82.49                                                                                                                                             |
| <b>Stroke</b>            | 430-439.6, V12.54, V17.1                                                                                                                                                      | G45-G46.8, I60-I62, I62.9-I64, I64.1, I65-I69.998, Z82.3                                                                                                                         |



**Table S2** Changes in age-standardized chronic kidney disease (CKD) mortality rates (per 100,000 population) for males and females in each of the 50 countries. Numbers in parentheses are 95% Uncertainty Intervals (UIs).

| Country       | Female mortality rate (per 100,000 population) |                         |                   | Male mortality rate (per 100,000 population) |                         |                   |
|---------------|------------------------------------------------|-------------------------|-------------------|----------------------------------------------|-------------------------|-------------------|
|               | 1990                                           | 2019                    | Percentage change | 1990                                         | 2019                    | Percentage change |
| <b>Global</b> | <b>13.9 (12.9-14.8)</b>                        | <b>15.8 (14.2-17.1)</b> | <b>13.7</b>       | <b>19.6 (18.2-21.2)</b>                      | <b>21.6 (19.9-23.3)</b> | <b>10.4</b>       |
| Afghanistan   | 54.6 (39.8-87.8)                               | 50.1 (35.2-84.9)        | -8.3              | 56.7 (40.4-83.7)                             | 48.5 (34.1-75.1)        | -14.4             |
| Algeria       | 41.6 (29.9-66.9)                               | 38.3 (28.6-54.3)        | -8.0              | 36.5 (28.6-47.4)                             | 26.8 (20.5-35.7)        | -26.6             |
| Angola        | 17.4 (6.7-25.5)                                | 18. (7.8-25.2)          | 3.6               | 37.9 (26.9-46.3)                             | 33.9 (27.1-41.2)        | -10.5             |
| Argentina     | 18.3 (16.9-19.8)                               | 22.9 (20.3-25.3)        | 24.6              | 31. (29.1-32.8)                              | 36.7 (33.6-39.8)        | 18.5              |
| Bangladesh    | 11.3 (7.2-14.7)                                | 10.4 (8.-13.1)          | -7.6              | 15.8 (10.7-19.4)                             | 11.5 (9.1-14.4)         | -27.1             |
| Brazil        | 16.8 (15.6-17.7)                               | 15.8 (14.1-17.)         | -6.1              | 22.8 (21.5-23.8)                             | 22.4 (20.5-23.7)        | -2.1              |
| Canada        | 7.1 (6.2-7.7)                                  | 8.2 (6.9-9.4)           | 16.4              | 10.8 (9.8-11.5)                              | 11.6 (10.4-12.8)        | 8.0               |
| China         | 12.1 (10.2-14.)                                | 9.6 (7.8-11.4)          | -20.6             | 14.8 (12.6-17.4)                             | 13.9 (11.6-16.6)        | -6.1              |
| Colombia      | 19.8 (18.1-21.3)                               | 14.4 (11.1-18.1)        | -27.3             | 22.7 (21.1-24.1)                             | 21.4 (16.5-27.2)        | -6.0              |
| DRC           | 23.5 (18.7-28.4)                               | 21. (15.1-27.4)         | -10.5             | 37.7 (31.3-44.6)                             | 30.2 (23.5-37.1)        | -20.0             |
| Egypt         | 44.5 (25.5-58.9)                               | 57.5 (26.8-81.2)        | 29.3              | 34.2 (26.9-44.8)                             | 36. (23.2-58.5)         | 5.2               |
| Ethiopia      | 32.6 (23.8-41.3)                               | 21.5 (18.-25.2)         | -34.0             | 46.3 (36.8-56.8)                             | 30.5 (24.7-37.3)        | -34.1             |
| France        | 6.2 (5.4-6.8)                                  | 5.1 (4.-5.9)            | -17.8             | 11.9 (10.8-12.8)                             | 9.1 (7.8-10.1)          | -23.0             |
| Germany       | 6.3 (5.8-6.7)                                  | 13.4 (11.3-14.9)        | 113.2             | 8.5 (8.-9.)                                  | 16.6 (14.7-18.1)        | 94.7              |
| Ghana         | 30.1 (21.4-44.4)                               | 30. (21.8-37.6)         | -0.5              | 25.5 (19.2-31.9)                             | 34.2 (21.6-44.6)        | 33.9              |
| India         | 17.9 (13.5-21.6)                               | 16.9 (13.6-20.6)        | -5.3              | 27.4 (22.8-33.3)                             | 25.5 (20.9-30.6)        | -7.2              |
| Indonesia     | 19. (16.2-22.3)                                | 16.9 (13.7-20.1)        | -11.2             | 23.6 (20.4-27.2)                             | 25.8 (21.1-30.7)        | 9.5               |
| Iran          | 22.6 (19.6-31.5)                               | 19.4 (17.3-20.9)        | -14.3             | 25.6 (22.5-28.4)                             | 20.2 (18.-22.)          | -21.2             |
| Iraq          | 44.6 (33.5-66.3)                               | 35.3 (27.6-45.8)        | -20.8             | 48.4 (37.3-68.8)                             | 49.9 (36.9-72.5)        | 3.1               |
| Italy         | 8.1 (7.5-8.5)                                  | 7.2 (6.-8.)             | -11.3             | 12.7 (11.9-13.1)                             | 10.9 (9.5-11.6)         | -14.3             |
| Japan         | 10.9 (9.6-11.6)                                | 6.9 (5.2-7.9)           | -36.9             | 16. (14.9-16.6)                              | 11.6 (10.-12.5)         | -27.6             |
| Kenya         | 16.9 (14.2-21.3)                               | 21. (16.7-26.2)         | 24.5              | 25.2 (19.7-33.)                              | 30.8 (23.9-38.7)        | 22.2              |
| Malaysia      | 21.9 (19.4-24.9)                               | 26.6 (21.1-32.8)        | 21.5              | 27.8 (24.7-31.3)                             | 24.5 (19.1-30.5)        | -11.9             |
| Mexico        | 31.5 (29.3-32.9)                               | 56.8 (47.5-68.2)        | 80.6              | 30. (28.3-31.1)                              | 71.5 (59.1-86.7)        | 138.3             |
| Morocco       | 27.8 (22.2-43.3)                               | 36.3 (27.4-49.)         | 30.5              | 31.7 (24.7-45.3)                             | 35.4 (25.1-50.2)        | 11.9              |
| Mozambique    | 18.1 (14.7-22.2)                               | 19.8 (15.-26.)          | 9.2               | 28.7 (22.1-38.5)                             | 34.7 (27.8-42.3)        | 21.0              |
| Myanmar       | 30.4 (23.2-41.)                                | 24.5 (20.6-30.5)        | -19.5             | 31.8 (23.5-41.5)                             | 30.2 (25.8-36.)         | -4.9              |
| Nepal         | 17.2 (10.9-23.1)                               | 24.2 (14.8-31.9)        | 40.4              | 19.4 (13.8-29.5)                             | 26.1 (18.1-40.8)        | 34.3              |
| Nigeria       | 26. (19.5-35.8)                                | 21.6 (16.-27.9)         | -16.8             | 29.8 (22.4-39.6)                             | 28.3 (20.4-38.9)        | -5.0              |
| Pakistan      | 24.1 (14.-31.4)                                | 37.5 (23.4-50.7)        | 55.5              | 28.1 (19.6-45.)                              | 42.3 (30.3-59.3)        | 50.6              |
| Peru          | 22.4 (19.5-25.7)                               | 24.6 (18.3-31.9)        | 9.8               | 25.9 (22.4-29.7)                             | 24.8 (18.-32.6)         | -4.3              |
| Philippines   | 36.3 (32.1-41.3)                               | 39.4 (31.1-48.9)        | 8.6               | 40.3 (35.-46.8)                              | 50.9 (39.4-63.9)        | 26.4              |
| Poland        | 8.5 (8.-8.7)                                   | 5.2 (4.1-6.6)           | -38.7             | 14.2 (13.7-14.6)                             | 8.7 (7.2-10.7)          | -38.6             |
| South Korea   | 9.5 (8.7-10.4)                                 | 7.8 (6.4-9.)            | -17.9             | 17.4 (16.2-19.3)                             | 12.5 (11.-14.2)         | -28.0             |
| Russia        | 4.8 (4.6-5.1)                                  | 4.6 (3.8-5.4)           | -4.6              | 7. (6.7-7.2)                                 | 6.3 (5.3-7.4)           | -10.0             |
| Saudi Arabia  | 43.5 (34.6-54.4)                               | 53.5 (40.3-68.1)        | 22.8              | 52.4 (39.2-67.2)                             | 52.7 (42.4-64.6)        | 0.6               |

|              |                  |                  |       |                  |                  |       |
|--------------|------------------|------------------|-------|------------------|------------------|-------|
| South Africa | 17.5 (15.5-20.1) | 24.3 (21.4-26.9) | 39.1  | 28.9 (26.-33.2)  | 41.8 (38.2-45.2) | 44.3  |
| Spain        | 12.6 (11.1-13.8) | 9.8 (7.9-11.3)   | -22.4 | 18.5 (16.9-19.8) | 13. (11.5-14.5)  | -29.4 |
| Sudan        | 26.8 (19.8-40.7) | 27.4 (18.-40.7)  | 2.0   | 30.4 (23.2-45.5) | 29.4 (19.1-51.8) | -3.4  |
| Thailand     | 22.5 (19.1-26.5) | 27.1 (20.4-35.3) | 20.8  | 38.2 (32.1-45.2) | 28.6 (21.7-37.8) | -25.2 |
| Turkey       | 30.6 (24.3-46.5) | 22.6 (18.-27.9)  | -26.2 | 40.9 (30.7-60.6) | 24.5 (19.5-30.1) | -40.0 |
| Uganda       | 17.3 (12.5-25.7) | 19.4 (15.-26.8)  | 12.5  | 34.2 (26.2-42.2) | 34.9 (26.-43.)   | 2.0   |
| Ukraine      | 1.8 (1.7-1.9)    | 3. (2.4-3.6)     | 61.1  | 3.4 (3.2-3.6)    | 5.4 (4.5-6.4)    | 57.4  |
| UK           | 4.5 (4.1-4.7)    | 4.7 (4.1-5.1)    | 4.0   | 7.2 (6.8-7.5)    | 6.1 (5.6-6.5)    | -15.2 |
| Tanzania     | 22.3 (18.-28.1)  | 25.2 (21.-30.1)  | 13.0  | 31.7 (26.-38.5)  | 29.7 (24.2-36.2) | -6.3  |
| US           | 8.5 (7.7-8.9)    | 15.1 (13.4-16.6) | 78.7  | 12.5 (11.7-13.)  | 21.4 (19.8-22.4) | 70.9  |
| Uzbekistan   | 13.6 (10.9-21.9) | 16.9 (14.4-19.6) | 24.4  | 16. (14.5-18.)   | 23.7 (20.4-27.2) | 48.2  |
| Venezuela    | 13.5 (12.5-14.6) | 29.8 (22.6-38.7) | 120.0 | 19.3 (18.-20.5)  | 45.2 (34.5-57.9) | 134.4 |
| Viet Nam     | 31.5 (24.9-38.6) | 26.5 (19.9-31.9) | -16.0 | 25. (19.2-35.3)  | 26.3 (20.1-31.7) | 5.0   |
| Yemen        | 22.1 (15.8-34.5) | 21. (15.9-28.9)  | -5.3  | 29.6 (21.9-42.1) | 25.7 (19.-35.3)  | -13.2 |

**Table S3** Poisson regression estimates, with p values, for the association between 5-year age group and sex (coded as 0 for males and 1 for females) and the rate of chronic kidney disease (CKD) mortality, modelling age as a categorical variable.

| Coefficient             | Estimate | p value |
|-------------------------|----------|---------|
| Intercept               | 0.0002   | <0.001  |
| 25-29                   | 0.18     | <0.001  |
| 30-34                   | 0.12     | <0.001  |
| 35-39                   | 0.90     | <0.001  |
| 40-44                   | 0.20     | <0.001  |
| 45-49                   | 0.19     | <0.001  |
| 50-54                   | 3.03     | <0.001  |
| 55-59                   | 4.24     | <0.001  |
| 60-64                   | 2.86     | <0.001  |
| 65-69                   | 4.05     | <0.001  |
| 70-74                   | 7.59     | <0.001  |
| 75-79                   | 6.16     | <0.001  |
| 80-84                   | 2.64     | <0.001  |
| 85-89                   | 6.35     | <0.001  |
| Sex (reference: Male)   | 0.76     | <0.001  |
| 25-29 x sex interaction | 0.97     | 0.47    |
| 30-34 x sex interaction | 0.95     | 0.96    |
| 35-39 x sex interaction | 0.93     | 0.19    |
| 40-44 x sex interaction | 0.98     | 0.31    |
| 45-49 x sex interaction | 0.96     | 0.98    |
| 50-54 x sex interaction | 1.15     | <0.001  |
| 55-59 x sex interaction | 1.13     | <0.001  |
| 60-64 x sex interaction | 1.16     | <0.001  |
| 65-69 x sex interaction | 1.06     | <0.001  |
| 70-74 x sex interaction | 1.12     | <0.001  |
| 75-79 x sex interaction | 1.26     | <0.001  |
| 80-84 x sex interaction | 1.29     | <0.001  |
| 85-89 x sex interaction | 1.49     | <0.001  |

## References

1. Global Burden of Disease Collaborative Network. Global Burden of Disease Study 2019 (GBD 2019) Results. Seattle, United States: Institute for Health Metrics and Evaluation (IHME), 2020.2020 [Available from: <http://ghdx.healthdata.org/gbd-results-tool>].
